# Adaptive structural and functional evolution of the placenta protects fetal growth in high elevation deer mice

Kathryn Wilsterman<sup>1,2,a</sup>, Emily C. Moore<sup>1</sup>, Rena M. Schweizer<sup>1</sup>, Kirksey Cunningham<sup>1</sup>, Jeffrey M. Good<sup>1,3</sup>, and Zachary A. Cheviron<sup>1,3</sup>

<sup>1</sup>Div. of Biological Sciences, University of Montana, Missoula, MT; <sup>2</sup>Dept. of Biology, Colorado State University, Fort Collins, CO; <sup>3</sup>Wildlife Biology Program, University of Montana, Missoula, MT

This manuscript was compiled on February 25, 2023

**Environmental hypoxia challenges female reproductive physiology in placental mammals, increasing rates of gestational complications. Adaptation to high elevation has limited many of these effects in humans and other mammals, offering potential insight into the developmental processes that lead to and protect against hypoxia-related gestational complications. However, our understanding of these adaptations has been hampered by a lack of experimental work linking the functional, regulatory, and genetic underpinnings of gestational development in locally-adapted populations. Here, we dissect high-elevation adaptation in the reproductive physiology of deer mice, (*Peromyscus maniculatus*), a rodent species with an exceptionally broad elevational distribution that has emerged as a model for hypoxia adaptation. Using experimental acclimations, we show that lowland mice experience pronounced fetal growth restriction when challenged with gestational hypoxia, while highland mice maintain normal growth by expanding the compartment of the placenta that facilitates nutrient and gas exchange between dam and fetus. We then use compartment-specific transcriptome analyses to show that adaptive structural remodeling of the placenta is coincident with widespread changes in gene expression within this same compartment. Genes associated with fetal growth in deer mice significantly overlap with genes involved in human placental development, pointing to conserved or convergent pathways underlying these processes. Finally, we overlay our results with genetic data from natural populations to identify candidate genes and genomic features that contribute to these placental adaptations. Collectively, these experiments advance our understanding of adaptation to hypoxic environments by revealing physiological and genetic mechanisms that shape fetal growth trajectories under maternal hypoxia.**

altitude | *Peromyscus* | labyrinth zone | angiogenesis | gene expression

High elevation (> 2500 m) environments fundamentally challenge terrestrial life through an inescapable and pervasive reduction in oxygen availability. Low oxygen directly limits individual performance, and common physiological responses to low oxygen can further exacerbate these performance decrements (1–3). Low oxygen also compromises reproduction (4–6); in humans, residence at high elevations is associated with reduced birth weight and increased risks for birth complications, including intra-uterine growth restriction (4). Compromised reproductive function should have significant consequences for populations because reproductive outcomes are the ultimate arbiters of Darwinian fitness. Indeed, humans with altitude-adapted ancestry (e.g., Tibetan and Quechua peoples) experience reduced risk for these complications (7), presumably reflecting local adaptation in reproductive physiology.

Comparative analyses within and between species adapted to high elevations can provide clues about how the challenges of hypoxia are surmounted by adaptive evolution. Such analyses are common in comparative physiology, but these analyses have rarely considered prenatal reproductive physiology outside of humans (5, 6). In contrast to well-studied cardiopulmonary and metabolic adaptations to hypoxia, the reproductive physiology that influences fetal growth outcomes at high elevations remains poorly understood. To date, maternal traits, including ventilatory characteristics, uterine artery diameter, and microvascular structure in the placenta, have been hypothesized to contribute to fetal growth restriction (and protection thereof at elevation) (5, 7). However, mechanistic links between these traits and fetal growth remain limited.

The deer mouse, *Peromyscus maniculatus*, is a promising model system for investigating how adaptive evolution has mediated the fundamental challenges hypoxia poses to gestational physiology. Several aspects of deer mouse biology make them a useful comparative model for such questions. First, deer mice are a well-established model for studying adaptive evolution (8), including adaptation to high elevation environments (reviewed in (9–11)), though prenatal reproductive adaptations have not yet been explored in this system

## Significance Statement

Residence at high elevations is associated with higher risk pregnancies and low birth weight, yet the causal mechanisms remain poorly understood. Using a high elevation-adapted rodent model, we investigated the physiological traits that explain fetal growth trajectories in low oxygen environments, and how evolutionary adaptation has modified these traits. We showed that high- and low-elevation populations of deer mice differ in their susceptibility to fetal growth restriction during gestational hypoxia and that these population-level differences are associated with structural and transcriptomic changes in the placenta. We further link placental gene expression to genomic features under selection at high elevation. Our findings identify adaptations that are likely relevant to offsetting the effects of hypoxia on fetal and placental development across mammals.

KW and ZAC conceived of the experiments with input from JMG. KW carried out all animal work and sample collection. KC conducted maternal trait data analysis. KW, ECM, and RMS carried out sequence data analyses and summary. KW completed all other data generation and statistical analyses using code generated by KC. KW wrote the manuscript with input and approval from all authors.

The authors have no competing interests to disclose.

<sup>a</sup>To whom correspondence should be addressed. E-mail: kwilst@rams.colostate.com

(6). Second, genetic differentiation and variation among wild deer mouse populations is well-characterized (12–14), and genetic signatures of local adaptation in highland deer mice persist in the face of high rates of gene flow (12, 15). The low genome-wide genetic differentiation among deer mouse populations allows for fine-scale resolution of genomic regions that have experienced a history of natural selection at high elevation, which can be informative for understanding the physiological basis of adaptation (e.g., (12, 15)). Third, high elevation deer mouse populations are derived from lowland populations (13), which mirrors the biogeographic history of many highland human populations (i.e., lowland individuals moving into and adapting to highland environments). Related, deer mice and humans share fundamental aspects of placental structure (16, 17), and many of the maternal traits that are adjusted to support pregnancy in humans are also remodeled in deer mice (16). Together, the similarities in biogeographic history and reproductive physiology provide an opportunity to identify conserved or convergent solutions to the challenges that high elevation places on reproductive physiology.

Here, we used hypoxia acclimation experiments to link population-specific reproductive outcomes to subordinate physiological traits. We further investigated transcriptomic variation in the placenta, linking expression patterns to fetal growth and population-specific hypoxia responses, and we asked whether these transcriptomic signatures were associated with genomic targets of local adaptation (12, 14, 15). Our analyses identify mechanisms by which placental physiology and maternal hypoxia interact to influence fetal growth, and they highlight both new and established genetic targets that are closely tied to these developmental processes.

## 71 Results and Discussion

**72 Fetal growth under maternal hypoxia in deer mice.** If fetal growth restriction is a fundamental challenge that impacts survival and fitness of mammals at high elevation, we expected that (a) lowland-derived deer mice should give birth to smaller pups when gestating under hypobaric hypoxia (hereafter, hypoxia), and (b) highland-adapted deer mice should protect fetal growth under the same conditions. We compared birth weights of deer mouse pups born to dams gestating under normoxia to those born to dams held in hypoxia, using deer mice derived from Ann Arbor, Michigan (appx. 250 m ASL, lowlanders) and Mt. Evans, CO (4300 m ASL, highlanders; Table 1, Fig. 1A). As predicted, pups from lowland dams gestating under hypoxia were nearly 20% smaller (in mass) than their normoxia-gestated counterparts (Fig. 1B; Lowland N vs Lowland H:  $P < 0.05$ , see fig. caption). Strikingly, highland dams gestating under hypoxia gave birth to pups that did not differ in mass from their normoxia-gestated counterparts (Fig. 1B; Highland N vs Highland H:  $P = 0.99$ , see fig. caption), suggesting that local adaptation to high elevation environments has involved changes to reproductive physiology that prevent hypoxia-dependent fetal growth restriction.

**93 Maternal physiology and fetal growth under hypoxia.** Next, we asked whether maternal physiology could explain population differences in fetal growth outcomes at mid-gestation (day 18.5/19.5 of a 23–24 day gestation; Theiler stage 23/24;  $N = 8$ –10 dams per group, Table 1), at which point the fetal growth phenotype is already apparent (Fig. 1C; LMM, Pop.xO<sub>2</sub>:

**Table 1. Sample sizes across populations and treatments. For mid-pregnancy, the subsets of total pups used for sequencing experiments are indicated in parentheses**

| Pop.     | Treatment | Birth |      | Mid-preg. |            |
|----------|-----------|-------|------|-----------|------------|
|          |           | Dams  | Pups | Dams      | Pups(Seq.) |
| Lowland  | N         | 33    | 104  | 8         | 21(19)     |
| Lowland  | H         | 3     | 8    | 10        | 20(20)     |
| Highland | N         | 26    | 119  | 10        | 42(20)     |
| Highland | H         | 3     | 21   | 9         | 39(20)     |

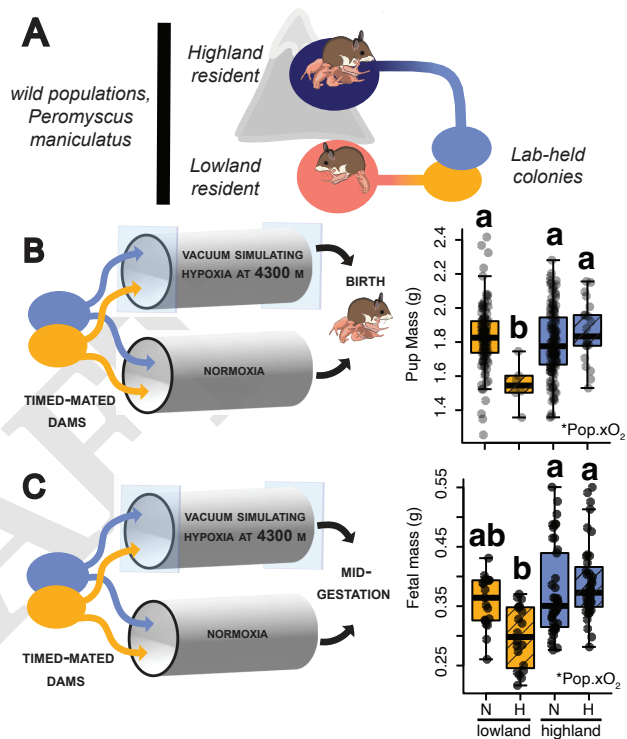

**Fig. 1.** (A) Lowland and highland deer mice were derived from wild-caught populations from low (pink/orange) and high (blue) elevations that have been maintained in lab colonies at low elevation for at least two generations. (B) To test for population-specific effects of hypoxia on birth weight, time-mated dams from each population were held under hypoxia or normoxia until birth in ventilated chambers made from large PVC pipes. While lowland dams gave birth to smaller pups under hypoxia (right; linear mixed model [LMM] overall Pop.xO<sub>2</sub>  $F_{1,145.69} = 7.13$ ,  $P = 0.008$ ; Low. N vs. Low. H:  $t_{129.4} = 2.89$ ,  $P = 0.02$ ), pups born to highland dams were not affected (High. N vs. High. H:  $t_{169.7} = -0.2$ ,  $P = 0.99$ ). Each point represents a single pup from a litter; LMM controls for litter size and includes dam ID as a random effect. (C) By mid-gestation, pups from lowland dams displayed fetal growth restriction (right; LMM, overall Pop.xO<sub>2</sub>  $F_{1,35.13} = 4.94$ ,  $P = 0.03$ ; Low. N vs. Low. H:  $t_{35.9} = 2.31$ ,  $P = 0.05$ ), whereas pups from highland dams did not (High. N vs. High. H:  $t_{32.1} = -0.77$ ,  $P = 0.54$ ). Each point represents a single pup from a litter; LMM includes dam ID as a random effect. Litter size did not affect pup weight at mid-gestation (Table S1). Significant interaction terms are indicated in the bottom right (\* $P < 0.05$ ). Different letters in (B) and (C) indicate significant ( $P < 0.05$ ) differences between group means in post-hoc tests. See Table 1 for sample sizes.

$P = 0.03$ ). One way in which maternal physiology may mediate fetal growth is via nutrient acquisition. Most rodents restrict food intake when held under hypoxia, which can limit fetal growth (22). However, food consumption was not suppressed by hypoxia in lowland or highland deer mice (Fig. S1; Table S2). Similarly, gestational hypoxia did not reduce mass gained

105 in lowland or highland dams across pregnancy (Fig. S1, Table  
106 S2) nor did maternal body condition explain fetal growth  
107 outcomes (Table S3).

108 Alternatively, maternal cardiopulmonary function could  
109 shape fetal growth trajectories under hypoxia (5, 7). We  
110 thus tested associations between fetal mass and a range of  
111 traits tied to cardiopulmonary function, including hematocrit,  
112 lung tissue mass, and heart mass, using linear models (LMs)  
113 accounting for maternal body size and *in utero* litter size (See  
114 SI Methods). Although we found that several of these traits  
115 were indeed affected by hypoxia (Fig. S1, Table S2), these  
116 traits failed to explain population differences in fetal growth  
117 (Table S3).

118 We next reasoned that small or interactive contributions  
119 of multiple maternal cardiopulmonary traits might influence  
120 fetal growth. To test this, we asked whether a combination  
121 of maternal physiological parameters explained fetal growth using  
122 a principal components analysis (PCA), the output of which  
123 is a set of principal components that represent multi-variate  
124 metrics (18, 19). However, these multi-variate metrics still  
125 failed to explain significant variation in fetal growth among  
126 populations and treatments (Table S3).

127 Our findings thus suggest that maternal physiology does  
128 not explain either hypoxia-dependent fetal growth restriction  
129 or protection thereof in adapted populations. This result con-  
130 trasts with findings in humans, where maternal traits like  
131 hematocrit or pulmonary function do provide predictive value  
132 with regards to fetal growth (4, 5). Because maternal phys-  
133 iology interacts broadly with fetal growth and development  
134 (20), it seems unlikely that maternal physiology is entirely  
135 inconsequential for fetal growth outcomes in deer mice. Other  
136 traits that we did not measure here (e.g., blood pressure or  
137 vascular tone in the uterine artery, (4, 7)) may still directly  
138 contribute to fetal growth outcomes. Alternatively, maternal  
139 traits may work in concert with placental development and  
140 function to mediate fetal growth.

141 **Structure of the placenta and fetal growth.** The placenta per-  
142 forms several functions that are essential for successful pregnan-  
143 cies, including gas and nutrient exchange between the maternal  
144 and fetal circulatory systems. Altered placental development  
145 has been repeatedly linked to fetal growth restriction associ-  
146 ated with chronic gestational hypoxia in humans and rodents  
147 (5, 21), so we next asked whether placental structure or func-  
148 tion explained fetal growth in deer mice. Indeed, we found that  
149 placenta mass was positively correlated with fetal mass at mid-  
150 gestation in highlanders (linear mixed model [LMM],  $P=0.03$ ;  
151 Fig. 2A,B, Table S4), suggesting that placenta growth or struc-  
152 ture contributes to protecting fetal growth under maternal  
153 hypoxia.

154 Rodent placentas are organized into three functional layers:  
155 the decidua, the junctional zone and the labyrinth zone (re-  
156 viewed in (22, 23)). The decidua is comprised predominantly  
157 of maternal tissues, and it is the region where fetal and mater-  
158 nal cell types interact to establish blood flow from maternal  
159 circulation to the placenta. The fetal compartments of the pla-  
160 centa include the junctional zone, which plays a key role in the  
161 production of hormones producing cell types responsible for  
162 vascular remodeling, and the labyrinth zone, where maternal  
163 and fetal circulatory systems are brought into close apposition  
164 to facilitate gas and nutrient exchange. Because each layer of  
165 the placenta performs distinct functions, the relative contribu-

166 tion of each to placental expansion present distinct functional  
167 hypotheses about how expansion protects fetal growth under  
168 maternal hypoxia. We therefore asked whether underlying  
169 variation in placental structure could explain fetal growth.

170 Using immunohistochemistry to differentiate layers along  
171 the midline of placentas collected from dams at mid-gestation  
172 (Fig. 2C), we found that placentas from highland dams gestat-  
173 ing under hypoxia had larger labyrinth zones as a proportion  
174 of the fetal placenta (LM,  $P<0.04$  for all contrasts; Table S5).  
175 The highlander labyrinth zones from hypoxic pregnancies also  
176 had a greater proportion of their volume allocated to blood  
177 space (Fig. 2E,F, Table S5), and the maternal canal (a promi-  
178 nent vascular structure in the placenta through which maternal  
179 blood returns to maternal circulation) was largest in placentas  
180 from highland dams gestating under hypoxia (Table S5).

181 These results point to vascular growth and organization  
182 within the labyrinth zone as key factors mediating fetal growth  
183 under chronic gestational hypoxia. Our data suggest that  
184 increases in blood delivery and the resultant opportunity for  
185 nutrient and gas exchange within the placenta contribute to  
186 fetal growth protection in highland deer mice. Laboratory  
187 strains of mice and rats gestating under hypoxia similarly  
188 expand labyrinth zone blood space, and this modification is  
189 associated with an increase in placental mass near term (21,  
190 24, 25). In contrast, the villous portion of the human placenta,  
191 which is functionally analogous to the labyrinth zone (17),  
192 tends to be smaller at term in high elevation pregnancies (5, 7).  
193 Nonetheless, humans with highland ancestry display other  
194 structural changes to the vasculature in this compartment that  
195 may counteract the overall decrease in volume (5, 7). Thus,  
196 structural differences that modify nutrient and gas exchange  
197 appear universally relevant to fetal growth outcomes under  
198 chronic gestational hypoxia.

199 Given our experimental design, we cannot say whether  
200 placental mass would be elevated in lowlanders subjected  
201 to gestational hypoxia near term, which would replicate the  
202 apparent adaptive structural remodeling shown in other labora-  
203 tory rodents (21, 24, 25). However, fetal growth restriction  
204 persists in these populations despite labyrinth zone expansion,  
205 demonstrating that these responses remain insufficient to pre-  
206 vent fetal growth restriction in some lowland lineages (24, 25).  
207 These limitations may stem from insufficiencies in the magni-  
208 tude or timing of expansion in lowlanders. Alternatively, full  
209 protection of fetal growth may require additional adaptations.

### 210 **Shared genes involved in gestational hypoxia and high eleva- 211 tion adaptation in humans and deer mice.**

212 Hypoxia-induced changes in endocrine signaling and gene expression are also  
213 likely to be important contributors to the that development  
214 and function of the placenta, and subsequent protection of  
215 fetal growth. Because of its roles in hormone production  
216 and coordinating maternal vasculature development at the  
217 implantation site, the junctional zone of the placenta has been  
218 a major focus for understanding fetal growth during gesta-  
219 tional hypoxia to-date (26–30). We were therefore interested  
220 in assessing the transcriptomic responses of each compartment  
221 (junctional zone/decidua and labyrinth zone) to hypoxia and  
222 in linking gene expression within each compartment to fetal  
223 growth trajectories.

224 We performed layer-enriched RNAseq on labyrinth zone  
225 and junctional zone/decidua tissues from lowland and highland  
226 dams sampled at mid-gestation ( $N = 19-20$  implantation sites

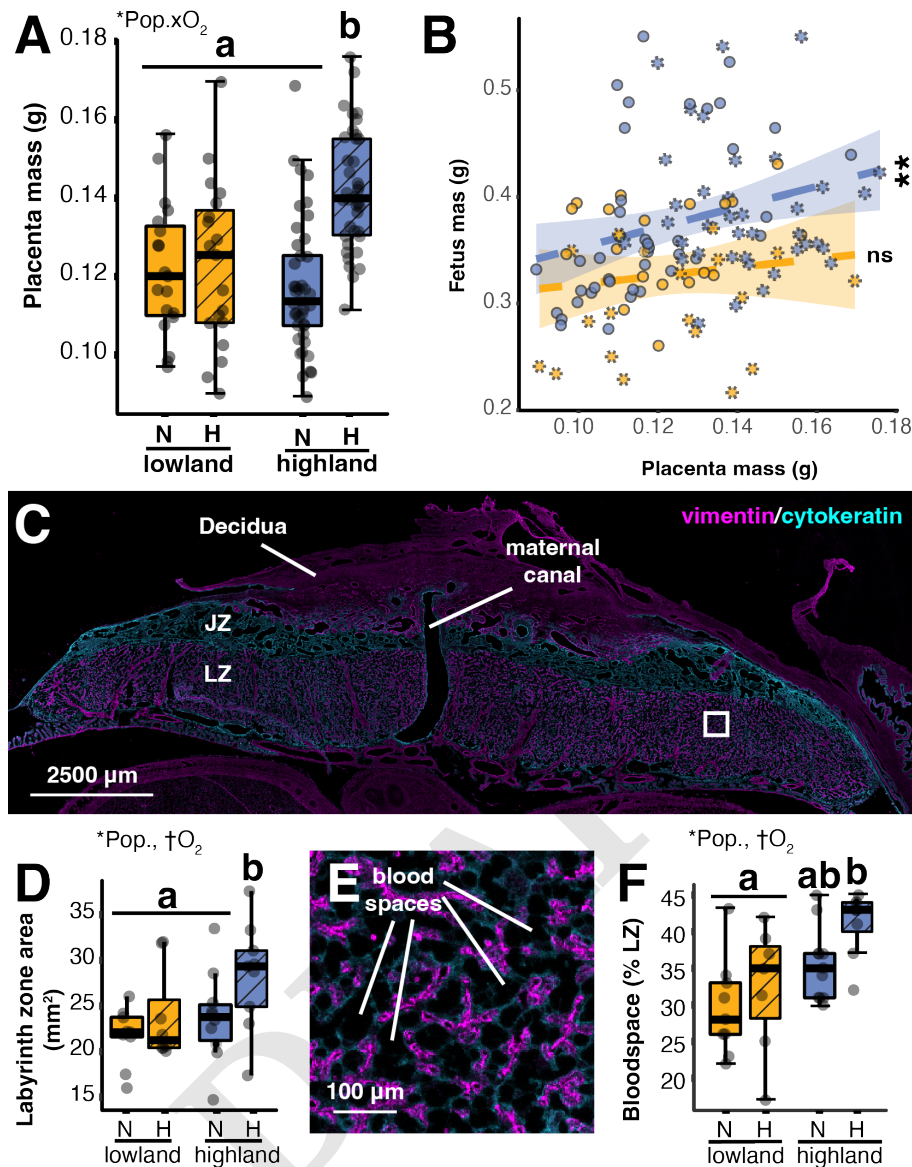

**Fig. 2.** Structural variation in the placenta explains fetal growth protection in highland deer mice. (A) Placenta mass at mid-gestation is larger specifically in highlanders gestating under hypoxia (LMM: Overall Pop. $\times$ O<sub>2</sub>,  $F_{1,33,52}=7.65$ ,  $P<0.01$ ) (B) Placental mass positively correlates with fetal mass, but only in highland deer mice (LMM,  $P=0.03$ , Table S4). (C) Compartment sizes and vascular structure within the placenta were quantified from mid-line cryosections that were fluorescently labeled with vimentin and cytokeratin. Maternal canal, decidua, labyrinth zone [LZ], and junctional zone [JZ] are indicated in the figure. White box outlines area expanded in panel E. (D) The labyrinth zone was relatively larger in highlanders under hypoxia than lowlander placentas (LM: Pop.,  $F_{1,30}=6.2$ ,  $P=0.018$ ; O<sub>2</sub>,  $F_{1,30}=3.53$ ,  $P=0.07$ ; Pop. $\times$ O<sub>2</sub>,  $F_{1,30}=3.01$ ,  $P=0.09$ ). (E) Expanded box from panel C showing blood space in labyrinth zone in detail. (F) Hypoxia increases blood space in the labyrinth zone, particularly in highlanders (LM, Pop.,  $F_{1,30}=12.8$ ,  $P=0.001$ ; O<sub>2</sub>,  $F_{1,30}=3.71$ ,  $P=0.06$ ; Pop. $\times$ O<sub>2</sub>,  $F_{1,30}=0.39$ ,  $P=0.53$ ). Significant interaction terms are shown in the bottom left of each boxplot (\* $P < 0.05$ , † $P < 0.07$ ). Different letters indicate significant ( $P < 0.05$ ) differences in post-hoc, pairwise comparisons among between group means. N = 8-11 implantation sites per group, each from unique dams.

227 per treatment per population, Table 1; layer enrichment following (31)). After filtering, we detected expression of 14,345  
 228 genes in the labyrinth zone, and 14,000 genes in the junctional zone/decidua tissues (see Methods and Supp. Info.; Table S17).  
 229 To identify genes that were relevant to fetal growth outcomes and adaptive evolution in response to environmental hypoxia,  
 230 we focused on genes whose expression (i) correlated with fetal mass, (ii) differed with gestational treatment (hypoxia vs.  
 231 normoxia), and/or (iii) differed between populations derived from different elevations. We first identified genes falling into  
 232 these categories using a LMM framework (dream, (32)); this  
 233  
 234  
 235  
 236  
 237

approach allowed us to account for non-independence among 238  
 samples collected from the same dam. We balanced sample 239  
 sizes across groups for fetal sex, however we did not find 240  
 substantive effects of sex on transcriptome-wide expression 241  
 among tissues, treatment (hypoxia or normoxia), or popula- 242  
 tion (lowlander or highland) (see **Supporting Information** 243  
 for details). Accordingly, fetal sex was not considered further. 244

We first examined expression within an *a priori* set of 245  
 genes hypothesized to be relevant to high elevation adaptation, 246  
 placental physiology, and fetal growth outcomes in humans 247  
 (33–41). Placental evolution has likely involved recurrent co- 248

option of common genetic pathways and neofunctionalization of gene duplications underlying similar developmental processes (42–44). To test for shared placental genetic responses to hypoxia in humans and mice, we evaluated an *a priori* gene list comprised of 212 genes and 7 receptor/ligand or gene families in humans, for which we were able to identify 253 genes in deer mice (orthologs and paralogs; Table S6). Of these, 204 were expressed in the deer mouse junctional zone/decidua and 208 were expressed within the deer mouse labyrinth zone. The expression of five genes (2.4%) in the junctional zone/decidua and 30 genes (14.4%) in the labyrinth zone were correlated with fetal growth outcomes (Fig. 3A). These proportions represent significant enrichment relative to proportion of genes correlated with fetal growth in the full dataset (Fisher’s Exact Test; junctional zone/decidua:  $P=3.5 \times 10^{-8}$ ; labyrinth zone:  $P=0.04$ ), suggesting that candidate genes shared between humans and deer mice are likely involved in similar core placental processes.

Of the genes in our *a priori* list, nine genes in the junctional zone/decidua and 21 genes in the labyrinth zone were significant for at least two of our focal comparisons (correlation with fetal mass, population effect, oxygen treatment effect, or their interaction; Fig. 3B; Table S6). In the junctional zone/decidua, we found associations between fetal growth and the expression of fetal hemoglobins *Hba-x* and *Hbb-y* (oxygen transport), *Plin2* (trophoblast cell survival under hypoxia (45)), and *F3* (clotting, pre-eclampsia risk (46)). In the labyrinth zone, the *a priori* genes for which expression was associated with fetal growth were involved in diverse processes including nutrient transport (i.e., *Slc32a2*, *Slc38a1*, *Fabp4*; (47)), vascular growth and function (i.e., *Edn1* and *Plagl1*; (48–50)), and trophoblast cell differentiation or survival (i.e., *Pappa2*, *Prkcz*, and *Mmp28*; (51–54)). Two of the most prominent gene candidates in humans, *PRKAA1* and *EDNRA* (33), were not significant for multiple focal comparisons of interest in deer mice. However, *Prkaa1* expression in the labyrinth zone was significantly correlated with fetal growth, and *Ednra* expression in both the labyrinth and junctional zones was constitutively lower in highlanders. These genes may thus still be of relevance to placental or fetal development under hypoxia in the deer mouse, as they are in humans. Overall, broad concordance among genes that underlie fetal growth outcomes in humans and deer mice suggests that there are fundamental similarities in how chronic hypoxia shapes placental development, likely resulting in evolutionary convergence in how mammals have mediated the challenges of gestation at high elevations.

**Global transcription associated with fetal growth.** A major limitation of *a priori* gene sets is that they are less likely to discover novel mechanisms. We therefore surveyed transcriptome-wide patterns of gene expression to identify additional genes associated with fetal growth in deer mice. We first used a gene-level expression analyses (dream (32)) to test for associations between expression and fetal growth outcomes. We found that expression of 1,354 genes in the labyrinth zone correlated with fetal growth; in striking contrast, fetal growth was correlated with the expression of only three genes in the junctional zone/decidua (Dataset 2). The relative absence of associations between gene expression in the junctional zone/decidua and fetal growth suggests that junctional zone and decidua cell types are not strongly tied to hypoxia-dependent variation in

early fetal growth phenotypes in deer mice. The labyrinth zone, on the other hand, showed patterns of extensive gene expression associations, which are consistent with our histological data showing that labyrinth zone structure contributed to protection of fetal growth in highland deer mice.

**Hypoxia-dependent fetal growth and expression of fetal hemoglobins.** Two of the three genes correlated with fetal growth in the junctional zone/decidua were also among those genes correlated with fetal growth in the labyrinth zone, and these genes (fetal hemoglobin subunits alpha and beta (*Hba-x* and *Hbb-y*)) had large effect sizes in both compartments. Fetal hemoglobin genes have greater oxygen affinity than their adult counterparts and are critical for moving oxygen from the maternal circulation into fetal circulation (55). Greater expression

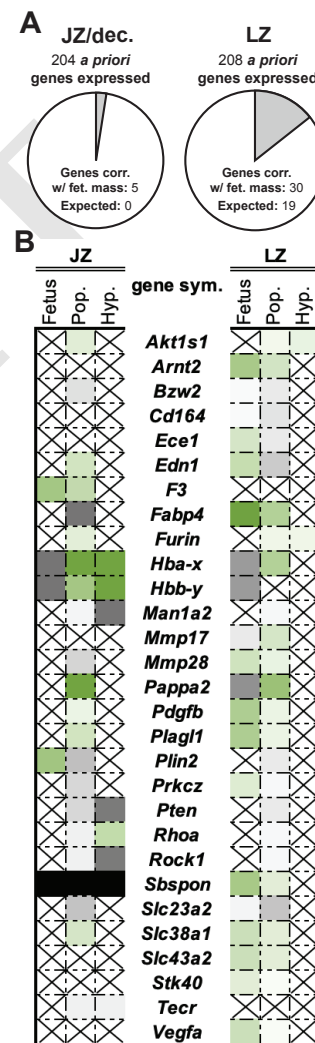

**Fig. 3.** (A) Pie charts showing enrichment for genes significantly correlated with fetal mass. (B) Summary table showing all *a priori* genes for which at least two categories in one tissue were significant. For all columns, cells are filled in significant correlations such that green cells are positively correlated or up-regulated, and grey cells are negatively correlated or down-regulated. Intensity of the color (i.e., light vs. dark grey) indicates log-fold-change of the effect. Numeric values are provided in Table S6. Black (*Sbspon* in JZ) indicates absence of expression in that tissue. For the population (“Pop.”) column, up-regulation (i.e., green fill) indicates greater expression in lowland deer mice, and down-regulation (i.e., dark grey fill) indicates greater expression in highland deer mice. Crosses indicate no significant relationship.

of fetal hemoglobins could support greater oxygen uptake by fetal tissues, thereby protecting fetal growth under maternal hypoxia. However, we found the opposite pattern: in both the junctional zone/decidua and labyrinth zone, expression of *Hba-x* and *Hbb-y* was negatively correlated with fetal mass (i.e., greater expression of hemoglobins was associated with smaller fetuses). Overexpression of hemoglobins is associated with microvascular damage and endothelial toxicity (56, 57), which could have detrimental effects on fetal growth. However, for a given expression level of *Hba-x* and *Hbb-y*, highlander fetuses still tended to be larger than lowlander fetuses (Dataset 2). Thus, if hemoglobin expression does contribute to fetal growth restriction via endothelial damage, there must be additional factors that exacerbate hemoglobin-related endothelial damage in lowlanders and/or mechanisms by which highlanders are protected from hemoglobin-related endothelial toxicity.

**Angiogenic processes and fetal growth under hypoxia.** We next focused on identifying the potential functions or processes by which changes in gene expression may be influencing fetal growth trajectories. With nearly 10% of expressed genes in the labyrinth zone associated with fetal growth, gene ontology (GO) analysis identified enrichment for a number of broad biological processes related to cell replication, division, and differentiation (Table S7). Among genes with expression positively correlated with fetal mass, we found enrichment for terms specifically linked to blood vessel growth and development (Table S8). In contrast, genes with expression that was negatively correlated with fetal mass remained enriched for broad cell division and replication terms (Table S9).

To resolve potential regulatory networks and the sets of co-expressed genes involved, we next applied an unsupervised network-based approach (WGCNA (58)) to our transcriptomic data. Unsupervised network-based approaches identify sets of genes with correlated patterns of expression (hereafter, gene modules) that can help identify regulatory mechanisms not apparent from gene-level tests of differential expression. The expression of these modules can be summarized using the first principle component of individual gene expression values (also known as the module eigengene E; (58)), and these eigengene values can then be associated with phenotypic outcomes. Using WGCNA, we constructed co-expression networks for each tissue separately; WGCNA identified 19 gene modules in the junctional zone/decidua and 20 modules within the labyrinth zone (See SI Methods for details). For ease of reporting results, we numbered modules consecutively by gene content such that the number of genes within the module increased as module number increased (i.e., the module M1 contained the fewest genes, and M20 contained the most genes; see Fig. 4).

We identified 3 modules in the labyrinth zone whose expression patterns correlated with fetal mass (Fig. 4A, Table S10). As expected from our gene-level differential expression analyses, there were no modules in the junctional zone/decidua that correlated with fetal mass (Fig. S2, Table S11). In the labyrinth zone, expression patterns in two of the three modules that correlated with fetal growth (M9 and M12) did not differ by population or hypoxia treatment (Table S10), suggesting that these gene sets influenced fetal growth but were not involved in hypoxia-dependent growth outcomes. In contrast, gene module M16 (434 genes) was positively correlated with fetal growth and hypoxia-responsive (Fig. 4B), and M16 was enriched for gene functions tied to angiogenesis

and blood vessel formation (Table S12). This module also included a number of angiogenic-associated genes identified in our *a priori* gene list (Fig. 4B). However, unlike patterns apparent in our gene-level differential expression analysis, M19 was hypoxia responsive, indicating that M19 is characterized by angiogenic genes that were also differentially-expressed in response to hypoxia. The positive correlation between this module and fetal growth along with the suppression of these genes in response to hypoxia (Fig. 4B) suggests that the down-regulation of these core vascular growth and angiogenic genes associated with fetal growth restriction in lowland deer mice. However, because highland expression follows similar patterns in the absence of fetal growth restriction, highlanders must also possess some adaptations that mediate these effects on fetal growth.

**Gene expression associated with adaptive protection of fetal growth in highlanders.** In search of gene sets that might explain highlander protection of fetal growth, we next focused on genes and gene modules that were differentially expressed by both population and hypoxia, a pattern suggestive of evolutionary modification of the regulation of hypoxia-sensitive gene networks (59). In the labyrinth zone, we found 228 genes and five gene modules where expression was sensitive to hypoxia and differed between highlanders and lowlanders, either through interactive effects (125 genes, and modules M1 and M13), or additive effects (103 genes, and modules M18, M19, M20) (Fig. 4A, Fig. S2). Here, we focus on those genes and modules where we found evidence for interactive effects.

M1 contained only 30 genes, which were enriched for the broad term “organelle membrane” and included genes associated with endoplasmic reticulum and Golgi apparatus function (Table S12). The larger module, M13, contained 350 genes that tend to be up-regulated by lowlanders under hypoxia, but down-regulated by highlanders (Figure S2). M13 contained the genes *Fosb* and *Igf2*, which are closely connected to placental growth and growth factor regulation (60, 61). Specifically, house mice (*Mus musculus*) up-regulate expression of *Igf2* in response to moderate hypoxia (24), which should benefit fetal growth by promoting vascular growth and expansion in the labyrinth zone (62). However, we found that highland deer mice *down-regulate* *Igf2* expression in response to hypoxia (Dataset 2), suggesting that up-regulation of *Igf2* seen in lowland rodents incurs some costs (i.e., the hypoxia-dependent plasticity has been reversed by natural selection, (59)). Pathway-specific investigations linking transcript abundance, protein production and half-life, and functional outcomes like microvascular structure or fetal growth trajectory under hypoxia will be necessary to better understand the trade-offs governing hypoxia and *Igf2* interactions in the placenta.

M13 was also functionally enriched for RNA metabolism and transcription (Table S12). This functional enrichment was also apparent in our gene-level differential expression analyses; the 125 genes that were individually significant for the interaction term (i.e., Pop.xO<sub>2</sub>) were enriched for a number of transcription factor binding motifs and ribonuclear protein terms (Table S12). Thus, the regulation of RNA synthesis and processing likely contributes to placental adaptations to maternal hypoxia. These processes may influence fetal growth by interacting with vascular growth pathways that were otherwise inhibited by hypoxia. Indeed, transcriptional

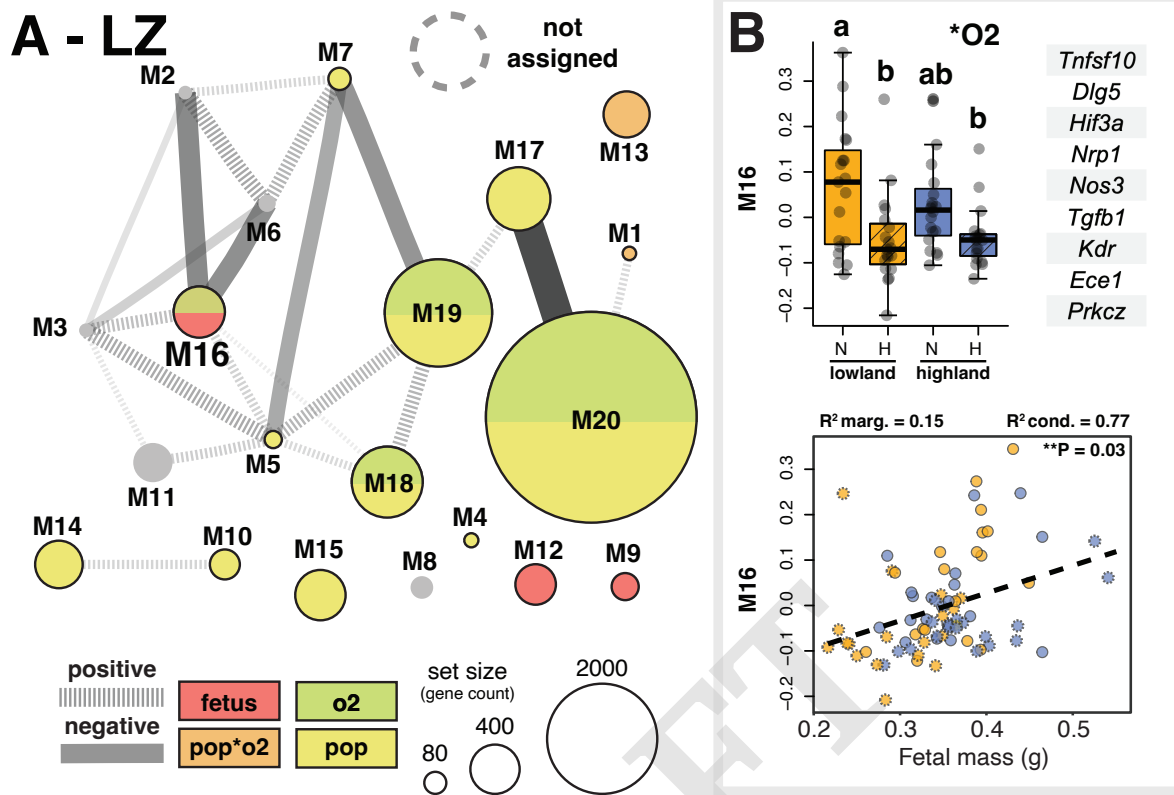

**Fig. 4.** (A) WGCNA module network illustrating gene expression and module connectivity within the labyrinth zone [LZ]. Modules (ellipses) are scaled by the number of genes in each module. Edges connect modules with a Pearson correlation of  $>0.6$ . Width and opacity of edges corresponds to strength of the correlation such that wider and darker edges indicate stronger correlations. Solid edges indicate positive associations, and dashed lines indicated negative correlations. Modules are also colored by their association with outcomes or experimental treatments of interest (fetal mass, red; population-by-hypoxia interactions, orange; hypoxia, green; population, yellow). (B) Plots of M16 eigengenes (see panel A) showing differences among treatment groups (boxplot) and correlation with fetal mass (scatter plots, right). Genes of *a priori* interest included in this module are listed to the right of the boxplot. In the boxplot, significant main effects are indicated in the top right ( $*P < 0.05$ ), and different letters indicate significant ( $P < 0.05$ ) differences between group means in post-hoc pairwise comparisons using a Benjamini-Hochberg p-value adjustment. In scatterplot, dashed lines show the linear relationship between fetal mass and the module eigengene. Within the scatterplot, p-values for the relationship between fetal mass and module eigengene is shown in the top right, and pseudo-R-squared values for the LMM are shown above.

446 repression and decreases in protein production have been  
 447 previously associated with hypoxic stress in the placenta (e.g.,  
 448 (63)), and thus one way in which highlanders may protect fetal  
 449 growth is by preventing this suppression.

450 **The genetic and genomic basis of placental adaptations in**  
 451 **highland deer mice.** Previous population genomic scans fo-  
 452 cused on elevational adaptation in mammals (e.g., (2, 12, 64-  
 453 67)) have lacked a detailed understanding of placenta-specific  
 454 developmental responses to gestational hypoxia, including in-  
 455 termediate gene expression changes (reviewed in (68)). Our  
 456 transcriptomic data thus uniquely positioned us to advance  
 457 our understanding of genotype-to-phenotype connections in  
 458 reproductive traits.

459 To ask whether local adaptation in high elevation deer mice  
 460 has targeted genes or sets of genes relevant to fetal outcomes,  
 461 we cross-referenced our placental gene sets with genes previ-  
 462 ously shown to be the targets of spatially-varying selection  
 463 associated with elevation in deer mice (12, 15). We identified  
 464 genes under positive selection in highland deer mice using two  
 465 metrics from (15): a redundancy analysis and the Population  
 466 Branch Statistic (PBS; (69)). The redundancy analysis was  
 467 used to test for genotypic associations with elevation. The

468 PBS is a measure of population differentiation similar to the  
 469 population fixation index ( $F_{ST}$ ), but it uses an outgroup to  
 470 polarize the direction of selection (described in more detail  
 471 in (12, 69)). Using this approach, higher PBS values signify  
 472 greater levels of differentiation in our high elevation population  
 473 relative to two low elevation populations (12), suggestive of  
 474 positive selection specific to the highland population (69). To  
 475 determine the significance threshold for empirically-derived  
 476 PBS values, (12) used the inferred demographic history of  
 477 these three populations to simulate a neutral background dis-  
 478 tribution of PBS to account for neutral differentiation and  
 479 minimize false positives due to genetic drift (see discussion in  
 480 Supporting Information). Values above the 99.9<sup>th</sup> percentile in  
 481 the simulated distribution were considered significant outliers.  
 482 In combination, these approaches identified 993 genes under  
 483 selection in the high elevation Colorado-based population from  
 484 which we sourced our experimental highland mice (Table S13).

485 We found that 626 of the genes bearing signatures of sele-  
 486 ction at high elevation were expressed in the labyrinth zone.  
 487 Using this full set of expressed genes under selection as a  
 488 background expectation, we found significant enrichment for  
 489 genes under selection in our *a priori* gene list (Fisher's Exact  
 490 Test,  $P = 0.002$ ). Enrichment for positive selection targets in

491 this gene list reinforces our previous findings that many of the  
492 genes involved in mediating the effects of gestational hypoxia  
493 on fetal growth are shared between humans and deer mice.  
494 While some of these genes coordinate hypoxia responses across  
495 many tissue types (e.g., *Angpt1*, *Epas1*), there were also genes  
496 within this set that have well-established and specific functions  
497 connected to placental development (e.g., matrix metallopro-  
498 teinases (21, 54), and the vascular endothelial growth factor  
499 receptor *Flt1* (21, 70)). However, we did not find that targets  
500 of selection were over-represented among genes correlated with  
501 fetal mass or among genes that exhibited population-specific re-  
502 sponses to hypoxia. The absence of overrepresentation among  
503 these gene sets suggests that the genes identified from our  
504 experimental manipulations are not each direct targets of local  
505 genetic adaptation. Instead, there are likely a small number  
506 of selection targets that shape transcriptome-wide patterns of  
507 expression (i.e., selection on a few regulatory factors) or that  
508 there are a few targets that have key functional impacts on  
509 their own.

510 Recently, (14) showed that large inversions in the genome  
511 are common across *P. maniculatus* populations and tend to  
512 harbor adaptive alleles that contribute to local adaptation in  
513 other deer mouse ecotypes. To test whether inversions might  
514 also contribute to adaptive gene expression in the highland  
515 deer mouse placenta, we used data from (14) to identify 14  
516 inversions segregating in highland and/or lowland deer mouse  
517 populations. Eight of these polymorphic inversions showed  
518 large haplotype frequency differences (>0.6) between highland  
519 and eastern lowland populations, consistent with an associa-  
520 tion between the inversion haplotypes and adaptation to high  
521 elevation environments (Table S14). We then asked whether  
522 these inversions were enriched for positive selection candi-  
523 dates expressed in the labyrinth zone and/or for genes that  
524 were associated with outcomes of interest (e.g., fetal mass,  
525 Pop.xO<sub>2</sub> interaction) in our differential expression analyses.  
526 Although these large inversions (ranging from 1.5 Mb to 43.8  
527 Mb) contained relatively few genes expressed in the labyrinth  
528 zone (Range: 7 – 274 genes), all 8 inversions showing large  
529 allele frequency differences between highland and lowland deer  
530 mice were enriched for selection candidates expressed in the  
531 labyrinth zone (Hypergeometric tests; P<0.006 for all inver-  
532 sions; Table S15, Fig. S4). Notably, the 8 elevation-associated  
533 inversions contained over 1/3<sup>rd</sup> of all selection candidates ex-  
534 pressed in the LZ, but only 4% of all genes in the genome. We  
535 further found that the inversions on chromosomes 6, 7, and  
536 15 were enriched for genes that were included in differential  
537 expression gene sets (e.g., Pop.xHypoxia, Fetus-assoc.) (Fig.  
538 S4).

539 Collectively, these results suggest that inversions are likely  
540 to play important roles in structuring the genomic architecture  
541 of local adaptation to high elevation in deer mice, and that at  
542 least some of these inversions contain genes that contribute  
543 to population-specific fetal growth trajectories under gesta-  
544 tional hypoxia. Moreover, the lack of enrichment for positive  
545 selection targets broadly among differentially-expressed genes  
546 indicate that the causal drivers of genome-wide transcriptomic  
547 responses to hypoxia are likely determined by evolutionary  
548 changes across relatively few key genes. That is, many of  
549 the changes in gene expression that track variation in fetal  
550 mass may represent correlated outcomes of a small number of  
551 selection targets, rather than the result of selection targeting

many of these genes individually. This inference should be  
considered preliminary since the genic targets of selection were  
identified from whole-exome data, which likely fails to capture  
differentiation of regulatory sequences that are not closely  
linked to sequenced exonic regions. Whole genome sequence  
data will be necessary to clarify relevant sequence variation  
in regulatory regions of genes that are functionally associated  
with fetal growth trajectories.

**A weighted-ranking approach to stratify genes in the labyrinth zone underlying fetal growth.** Given the limitations inherent to the current genomic scan in deer mice, we were also interested in developing a quantitative ranking for our large set of differentially expressed genes to help nominate specific candidate genes for further functional study. To accomplish this, we calculated a simple aggregate rank for each gene that considered effect size and p-value for associations with fetal growth or differential expression between populations and hypoxia treatment, as well as whether genes were selection targets or *a priori* candidates (Fig. 5A; see SI Methods).

This weighted ranking approach has the benefit of identifying genes that would not have been recognized through simple set-overlap approaches. Nonetheless, we found three genes within the top 1% of ranked genes that were also significantly associated with many of the gene sets of interest (Fig. 5A). These include a fetal hemoglobin (*Hba-x*, discussed above), and two more enigmatic genes, *Snx14* and *Thyn1* (Fig. 5, inset). Although both *Snx14* and *Thyn1* have been linked to adverse gestational outcomes (71, 72), these genes are expressed near-universally among placental cell types in humans and house mice (73–75), and thus their mechanism of action and cell type-specific importance remains unclear. Ultimately, experimental single-cell data from *Peromyscus* placentas and cell-type specific experimental work focused on these genes are likely necessary to ascertain their role in placental development.

Our top ranked gene (regardless of weighting) was *Muc2*, a gene belonging to the mucin family. Mucin proteins are secreted onto epithelial surfaces where they provide lubrication and chemical barriers and can perform cell signaling roles (76, 77), suggesting that the extracellular environment may be a key factor shaping population-specific effects of gestational hypoxia on fetal growth. Indeed, the top 1% of genes in our ranking were enriched for functions that are involved in extracellular matrix organization and collagen metabolism (Table S16). Although *Muc2* expression in humans is absent from the placenta, the placental production of other mucins is common, and dysregulated expression of mucins have been implicated in a variety of placental development and pathologies (78–81). More broadly, collagen dysregulation and its metabolism in the extracellular matrix have been linked to vascular defects in the labyrinth zone (82–84). Combined with our earlier analyses pointing to angiogenesis broadly as relevant to fetal growth outcomes, our weighted ranking analysis specifically suggests that processes involved in *building* vasculature (as opposed to regulatory signals that promote vasculogenesis) are likely key determinants of fetal growth trajectories.

The top 12 genes in our ranking are provided in Fig. 5B. Many of these genes have putative roles in fetal growth or placental hypoxia responses, which affirms that mechanisms well-studied in other model systems and humans are important in deer mouse placentation and fetal growth. For example,



613 placental expression of *Edn1* and *Abi3bp* in the placenta are  
 614 associated with hypoxia-related pregnancy complications in  
 615 humans (21, 50, 85).

616 Perhaps most compelling, two of our top 12 genes (*Daam2*  
 617 and *Pappa2*) are intimately associated with placental develop-  
 618 ment and fetal growth. Hypoxia-dependent overexpression of  
 619 *Daam2* has recently been implicated in fetal growth restriction  
 620 in humans (86). Although *Daam2* expression was not directly  
 621 correlated with fetal mass in our deer mice, down-regulation  
 622 of expression (Fig. 5B) is consistent with protective effects  
 623 for fetal growth. Thus, although the response to hypoxia  
 624 differs between humans and deer mice, the role in shaping  
 625 fetal growth may be similar. *Pappa2* has been a gene of inter-  
 626 est in fetal growth and hypoxia research for over a decade  
 627 and thus much is known about its potential role in hypoxia-

related gestational complications. Overexpression of *Pappa2*  
 628 has been associated with inhibition of trophoblast migration  
 629 and pre-eclampsia development (87–89), and indeed we find  
 630 a strong negative correlation between *Pappa2* expression in the  
 631 labyrinth zone and fetal growth outcomes in deer mice  
 632 (Dataset 2). However, *Pappa2* is constitutively expressed at  
 633 high levels in the highlander labyrinth zone (Fig. 5B). Inter-  
 634 estingly, Andean women resident at high elevations also  
 635 display elevated serum concentrations of PAPP2, despite its  
 636 association with pre-eclampsia risk in this population (88).  
 637 This could suggest that elevated expression of *Pappa2* is adap-  
 638 tive in other contexts that preclude placental adaptations to  
 639 expression. Alternatively, post-transcriptional gene regulatory  
 640 mechanisms, such as those identified our gene module analyses,  
 641 may mediate the effects of high *Pappa2* transcript abundance  
 642

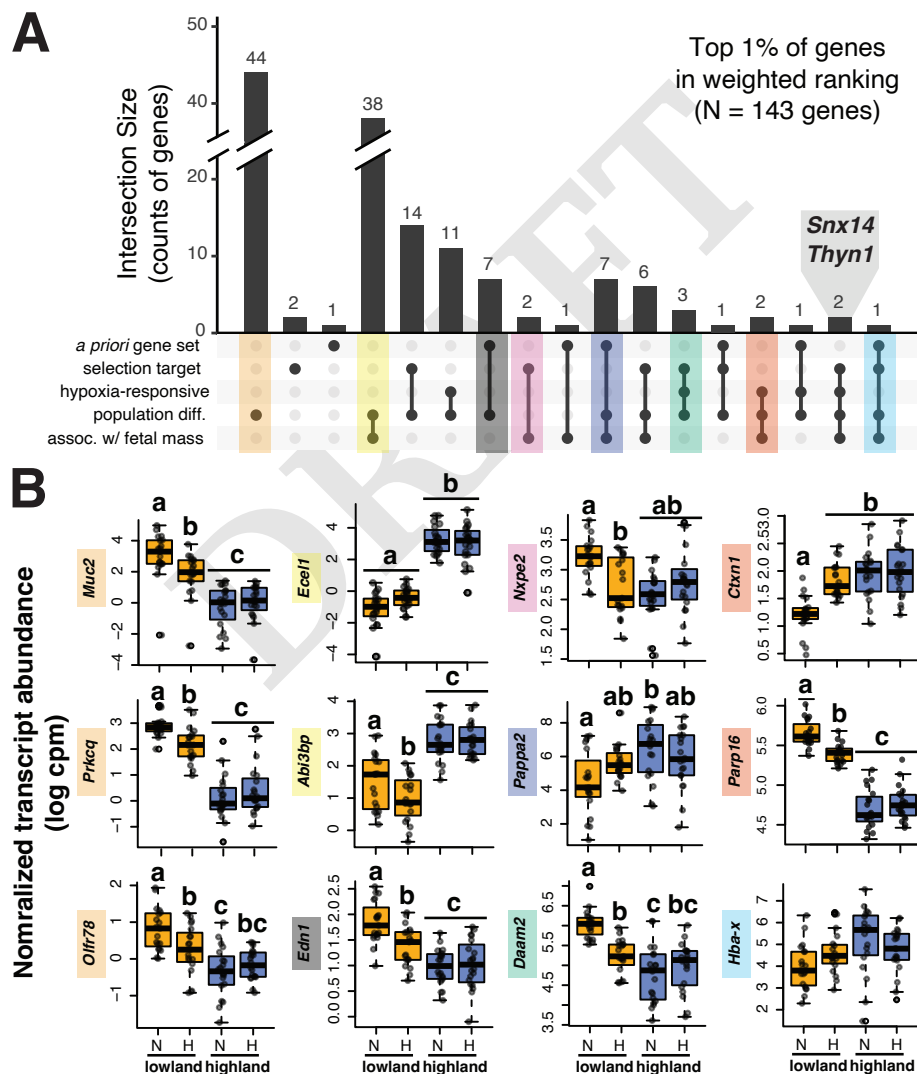

**Fig. 5.** (A) UpSet plot illustrating intersection size based only on FDR-corrected statistical significance in a differential expression framework for all genes within the top 1% of weighted rankings (N = 143). Grey inset shows genes that were significant for 4 categories but that do not appear in panel [B]. (B) Expression differences among populations and gestational treatments for the top twelve (12) candidate genes associated with fetal growth and population-specific gene regulation based on a weighted ranking system approach (see text and methods for details). Each boxplot shows the normalized transcript abundance as log-transformed counts per million (log cpm) by population and treatment. The specific gene is indicated on the immediate Y axis label. Mean group differences were evaluated in a LMM framework (see Methods). In boxplots, different letters indicate significant ( $P < 0.05$ ) differences between group means in post-hoc pairwise comparisons using a Benjamini-Hochberg p-value adjustment. Colors behind each gene name indicate which intersection set contains that gene.

643 in highland deer mice.

644 Beyond the data from Andeans, which did not assess adap- 704  
645 tive function, neither *Pappa2* nor *Daam2* have previously 705  
646 been suggested as relevant to adaptation to high-elevation 706  
647 humans or other mammals. Experimental work that demon- 707  
648 strates the functional relevance of these candidate genes (e.g., 708  
649 using genetic tools to manipulate expression in specific cell 709  
650 types, either *in vivo* or *in vitro*) is necessary to begin to under- 710  
651 stand their functional importance for hypoxia-dependent fetal 711  
652 growth restriction and adaptive processes that may modify 712  
653 those associations. 713

654 **Conclusions.** Understanding the basis of reproductive adap- 714  
655 tations to high elevation has the potential to yield important 715  
656 insights for fields of medicine, physiology, and evolutionary 716  
657 biology. However, progress in these areas has been hampered 717  
658 by the absence of an accessible study system. Our work shows 718  
659 that an established rodent model for adaptation to high eleva- 719  
660 tion, *Peromyscus maniculatus*, can be used to understand the 720  
661 drivers of fetal growth trajectories in lowland and highland 721  
662 populations under hypoxia. 722

663 We found both structural and functional evidence that fetal 723  
664 growth under hypoxia is tied to the development and organi- 724  
665 zation of the placental zone responsible for nutrient and gas 725  
666 exchange. Hypoxia-dependent suppression of gene expression 726  
667 related to angiogenesis and vascular growth in the placenta 727  
668 appears to be an ancestral response to hypoxia that persists 728  
669 in highland-adapted deer mice. As part of their adaptation 729  
670 to high elevation environments, highland deer mice have over- 730  
671 come these effects through (a) modification of pathways that 731  
672 ultimately promote expansion of the placental compartment 732  
673 responsible for gas and nutrient exchange, (b) alterations to 733  
674 hypoxia-sensitive expression of genes tied to the regulation 734  
675 of RNA transcription and processing, (c) sequence evolution 735  
676 in genes associated with to hypoxia-dependent fetal growth 736  
677 trajectories, and (d) structural features (i.e., inversions) in the 737  
678 genome that preserve associations among adaptive alleles. 738

679 We also showed that many of these genes relevant to adap- 739  
680 tive phenotypes in deer mice are the focus of on-going work 740  
681 in humans or have understood roles in human placental devel- 741  
682 opment or responses to hypoxia. The deer mouse and human 742  
683 placenta thus likely share fundamental gene networks involved 743  
684 in mediating hypoxia responses. In addition to affirming deer 744  
685 mice as a potential translational model, these findings point to 745  
686 conserved or convergent gene regulatory patterns that shape 746  
687 adaptive evolution in divergent mammals. 747

688 Ultimately, the experiments and analyses presented here 748  
689 only scratch the surface of a complex physiological trait (fetal 749  
690 growth). Our results point towards several mechanisms that 750  
691 may contribute to population-differences in susceptibility to 751  
692 hypoxia-related fetal growth restriction. The links between 752  
693 differential gene expression and fetal growth trajectories may 753  
694 simply involve altered abundance of those same proteins, or 754  
695 complex changes in transcript half-life, RNA interference, or 755  
696 protein-protein interactions. Similarly, we expect cell-type 756  
697 within the placenta to provide critical context for furthering 757  
698 our mechanistic understanding of how genetic variants lead 758  
699 to altered placental development and fetal growth protection 759  
700 under maternal hypoxia. 760

701 Our findings thus establish a basic understanding of the 761  
702 genetic and physiological factors associated with gestational 762  
703 outcomes in a tractable rodent model that can be used to 763  
764  
765  
766

704 pursue a much broader set of questions. This model opens new 705  
706 avenues for exploring how mammalian reproduction adapts 707  
708 and evolves to meet fundamental challenges in ways that 709  
710 also inform research interested in clinical interventions or 711  
712 diagnostics that are important for maternal-fetal health. 713

**Data Availability.** Phenotypic and histological data generated 709  
710 and analyzed as part of this study will be included in the 711  
712 published article online supporting files (Datasets S1 and S2). 713  
714 Raw reads from RNAseq datasets will be made available via 715  
716 SRA accession. 717

**Supporting Information Appendix (SI) included.** 714

**SI Datasets.** Datasets S1 and S2 are provided with this 715  
716 manuscript. 717

## 717 **Materials and Methods** 718

**Animal breeding, handling, and experimental design.** All experimen- 718  
719 tal procedures were carried out under IACUC-approved protocols 720  
721 at Univ. of Montana. Highland-adapted deer mice (*P. maniculatus*) 722  
723 were bred at Univ. of Montana from stock trapped at the summit 724  
725 of Mount Evans, CO. All highland-adapted deer mice were second 726  
727 generation offspring from wild-caught individuals (i.e., F2). Low- 728  
729 land deer mice were purchased from the Univ. of South Carolina 730  
731 stock center. Lowland deer mice (BW strain) are derived from a 732  
733 population trapped in Ann Arbor, MI. Further detail on genetic 734  
735 differentiation and divergence between these populations is provided 736  
737 in the **Supporting Information**. Pregnant dams were assigned 738  
739 to either hypobaric hypoxia or normobaric normoxia on day 1 of 740  
741 pregnancy. Animals assigned to hypobaric hypoxia were held under 741  
742 conditions mimicking 4300 m elevation in identical housing as the 742  
743 normobaric normoxia counterparts. 743  
744

**Sample collection and handling.** Placenta, fetal, and maternal tissue 733  
734 and blood samples were collected on day 18.5-19.5 of 23-24 day 734  
735 gestation, corresponding to Theiler Stage 23/24. For each litter, 735  
736 whole implantation sites were collected into isopentane chilled on 736  
737 dry ice for immunohistochemistry. The remaining sites were held 737  
738 in chilled phosphate-buffered saline for dissection. Fetuses and 738  
739 placentas were individually weighed before dissection and snap 739  
740 freezing. Samples chosen for sequencing were distributed roughly 740  
741 evenly across dams in each group while balancing for sex (Table 741  
742 1, Table S15, Dataset 1). Details on maternal tissue handling and 742  
743 collection of other maternal trait data are provided in the Supporting 743  
744 Information. 744

**Placental histology.** Frozen implantation sites (N = 1 per dam per 745  
746 experimental group) were cryosectioned at 10  $\mu$ m and midline sec- 746  
747 tions (identified by the presence of the maternal canal) were slide 747  
748 mounted for immunohistochemistry. Following (90), sections were 748  
749 fixed with 4% paraformaldehyde, permeabilized using methanol, 749  
750 and blocked using 10% normal goat serum (Vector Laboratories S- 750  
751 1000). Sections were incubated over night with mouse anti-vimentin 751  
752 (Sigma-Aldrich V6630) followed by 1-h incubation with anti-mouse 752  
753 Alexafluor 568 (Invitrogen A11031). Sections were then incubated 753  
754 for 2-h with a pan-cytokeratin antibody conjugated to FITC (Sigma- 754  
755 Aldrich F3418) followed by DAPI to visualize nuclei. Immunostained 755  
756 sections were cover slipped with Fluoromount-G and stored at 4C 756  
757 until imaging on a Zeiss Laser-Scanning Microscope 880 at 10X. 757  
758 Quantification was performed using FIJI (ImageJ 2.0.0-rc-69/1.52p). 758  
759 Measures falling more than 3 SDs beyond the mean were excluded 759  
760 as erroneous. 760

**Statistical analyses.** Comparisons among populations and treatments 761  
762 were carried out in R 4.0.5 using `lm()` (base R) or `lmer()`(91). Where 762  
763 relevant (see **Supporting Info.**), we included litter size as a predic- 763  
764 tor, and we included maternal ID as a random effect. We assessed 764  
765 significance of fixed effects and interactions within models using 765  
766 type III sum of squares in the `car` package(92), and we performed 766

767 post-hoc tests within emmeans and lmerTest packages (93, 94)  
768 using a Benjamini-Hochberg correction for multiple comparisons.  
769 Full model results are provided in **Supporting Information and**  
770 **Tables**.

771 **RNAseq data generation and analysis.** Tissue was homogenized in  
772 TriReagent (T9424, Sigma Life Sciences) using a Qiagen TissueLyser,  
773 and RNA was extracted using a hybrid TriReagent – RNeasy spin  
774 column method. Following TriReagent phase separation, the aqueous  
775 phase was used as input to an RNeasy column (Qiagen 74106),  
776 after which the manufacturer’s protocol was followed. Stranded,  
777 RNA libraries were then prepared by Oregon Health & Sciences  
778 University and sequenced using 150 bp PE Illumina NovaSeqS4.  
779 We generated an average of 50.7M paired-end raw reads for our  
780 junctional zone/decidual samples (Range: 27.1 - 67.1M) and an average  
781 of 53.8M paired-end raw reads for our labyrinth zone samples  
782 (Range: 31.3 - 78.8M). Data were trimmed for adaptor contamination  
783 and quality using Trimmomatic (95). Sequences were then aligned  
784 to the *Peromyscus maniculatus bairdii* genome (assembly  
785 HU\_Pman\_2.1.3) using HISAT2 (96). Read counts were determined  
786 using featureCounts in Subread (97), allowing for fractional  
787 counting of mapping reads. We also annotated and mapped reads  
788 to 182 placenta-specific genes from *Mus* that were not annotated  
789 within the *P. maniculatus* genome (see Supporting Information).  
790 After filtering, mapping, and feature assignment, our analysis included  
791 an average of 29.5M reads from our junctional zone/decidual  
792 samples (Range: 16.2 - 39.3M), and an average of 31.3M reads from  
793 our labyrinth zone samples (Range: 17.2 - 47.4M) (Table S15).

794 **GO-enrichment analyses.** We cross-referenced *P. maniculatus* gene  
795 IDs with *Mus* gene IDs via Ensembl before running GO analyses. *P.*  
796 *maniculatus* genes without *Mus* orthologues could not be included  
797 in GO analyses, leaving us with 13,632 genes in the LZ and 13,269  
798 genes in the JZ/Dec. for enrichment analyses.

799 **a priori dataset generation.** We compiled *a priori* genes of interest  
800 from the literature, including genes hypothesized to be relevant  
801 to altitude adaptation and protection of fetal growth in humans  
802 (33, 35–39, 41) as well as genes with empirical evidence for differential  
803 expression among lowland and highland human populations in  
804 the placenta (34, 40). (34) and (40) focus on genes are differentially  
805 expressed between highlanders (Tibetans or Andeans) and lowlanders  
806 and hypoxia sensitivity. From (40), we included only the top  
807 10% of genes that were differentially expressed between highlanders  
808 and lowlanders (appx. 100 genes).

809 **Inversion analysis.** Using haplotype frequency data from (14), we  
810 identified chromosomal inversions segregating in highland (Colorado)  
811 and lowland (Nebraska and California) *P. maniculatus* populations.  
812 We then identified gene content within these inversions using genomic  
813 coordinates, also from (14). We tested for enrichment of our  
814 differentially expressed genes and genes under selection within  
815 inversions using a hypergeometric test (*phyper* function in R).

816 **ACKNOWLEDGMENTS.** The authors thank MJ Soares for support  
817 and advisement early in project development. The authors also  
818 thank the UNVEIL Research Network and members of the Cheviron  
819 and Good labs for feedback and input across the duration of the  
820 study. This work was supported by the National Institutes of Health  
821 (R15 HD103925, ZAC and KW; F32HD100086, KW; R01HD094787,  
822 JMG) and the National Science Foundation (IOS-1755411, ZAC;  
823 OIA-1736249, ZAC and JMG; DBI-1907233, KW). This study included  
824 research conducted in the UM Genomics Core, supported by a grant  
825 from the M. J. Murdock Charitable Trust (to JMG) and using  
826 computational resources from the UM’s Griz Shared Computing Cluster,  
827 supported by the National Science Foundation (CC-2018112 and  
828 OAC-1925267, JMG co-PI). The authors thank OHSU for support in  
829 RNAseq data generation.

- 830 1. JF Storz, GR Scott, ZA Cheviron, Phenotypic plasticity and genetic adaptation to high-altitude hypoxia in vertebrates. *J. Exp. Biol.* **213**, 4125–4136 (2010) PMID: 21112992.
- 831 2. JF Storz, ZA Cheviron, Physiological genomics of adaptation to high-altitude hypoxia. *Annu. review animal biosciences* **9**, 149 (2021) publisher: NIH Public Access.
- 832 3. JB West, *High Life: A History of High-Altitude Physiology and Medicine*. (Springer), (2013) Google-Books-ID: o0rhBwAAQBAJ.

4. LG Moore, Hypoxia and reproductive health: Reproductive challenges at high altitude: fertility, pregnancy and neonatal well-being. *Reproduction* **161**, F81–F90 (2021) publisher: Bioscientifica Ltd section: Reproduction. 836
5. K Wilsterman, ZA Cheviron, Fetal growth, high altitude, and evolutionary adaptation: a new perspective. *Am. J. Physiol. Integr. Comp. Physiol.* **321**, R279–R294 (2021). 837
6. CE Robertson, K Wilsterman, Developmental and reproductive physiology of small mammals at high altitude: challenges and evolutionary innovations. *J. Exp. Biol.* **223** (2020) number: 24 publisher: The Company of Biologists Ltd section: Review. 838
7. CG Julian, MJ Wilson, LG Moore, Evolutionary adaptation to high altitude: a view from in utero. *Am. journal human biology : official journal Hum. Biol. Counc.* **21**, 614–622 (2009) PMID: 19367578 PMCID: PMC2850611. 839
8. NL Bedford, HE Hoekstra, *Peromyscus* mice as a model for studying natural variation. *eLife* **4**, e06813 (2015). 840
9. JF Storz, ZA Cheviron, GB McClelland, GR Scott, Evolution of physiological performance capacities and environmental adaptation: insights from high-elevation deer mice (*peromyscus maniculatus*). *J. Mammal.* **100**, 910–922 (2019) publisher: Oxford Academic. 841
10. JF Storz, ZA Cheviron, Functional genomic insights into regulatory mechanisms of high-altitude adaptation. *Adv. experimental medicine biology* **903**, 113–128 (2016) PMID: 27343092 PMCID: PMC5482796. 842
11. JF Storz, et al., The molecular basis of high-altitude adaptation in deer mice. *PLoS Genet.* **3** (2007) number: 3 PMID: 17397259 PMCID: PMC1839143. 843
12. RM Schweizer, et al., Physiological and genomic evidence that selection on the transcription factor *epas1* has altered cardiovascular function in high-altitude deer mice. *PLOS Genet.* **15**, e1008420 (2019) number: 11 publisher: Public Library of Science. 844
13. C Natarajan, et al., Intraspecific polymorphism, interspecific divergence, and the origins of function-altering mutations in deer mouse hemoglobin. *Mol. Biol. Evol.* **32**, 978–997 (2015). 845
14. OS Harringmeyer, HE Hoekstra, Chromosomal inversion polymorphisms shape the genomic landscape of deer mice. *Nat. Ecol. & Evol.* **6**, 1965–1979 (2022) number: 12 publisher: Nature Publishing Group. 846
15. RM Schweizer, et al., Broad concordance in the spatial distribution of adaptive and neutral genetic variation across an elevational gradient in deer mice. *Mol. Biol. Evol.* **38**, 4286–4300 (2021). 847
16. PL Grigsby, Animal models to study placental development and function throughout normal and dysfunctional human pregnancy. *Semin. reproductive medicine* **34**, 11–16 (2016) number: 1 PMID: 26752715 PMCID: PMC4799492. 848
17. MJ Soares, KM Varberg, K Iqbal, Hemochorial placentation: development, function, and adaptations†. *Biol. Reproduction* **99**, 196–211 (2018). 849
18. H Abdi, LJ Williams, Principal component analysis. *WIREs Comput. Stat.* **2**, 433–459 (2010) <https://onlinelibrary.wiley.com/doi/pdf/10.1002/wics.101>. 850
19. T Schreiber, Processing of physiological data in *Nonlinear analysis of physiological data*. (Springer), p. 7–21 (1998). 851
20. PD Gluckman, MA Hanson, Maternal constraint of fetal growth and its consequences. *Semin. Fetal Neonatal Medicine* **9**, 419–425 (2004). 852
21. E Siragher, AN Sterrucci-Perri, Placental hypoxia: What have we learnt from small animal models? *Placenta* **113**, 29–47 (2021) PMID: 34074553. 853
22. J Schulkin, ML Power, *The Evolution of the Human Placenta*. (Johns Hopkins University Press, Baltimore), (2012) DOI: 10.1353/book.18851. 854
23. L Woods, V Perez-Garcia, M Hemberger, Regulation of placental development and its impact on fetal growth—new insights from mouse models. *Front. Endocrinol.* **9** (2018) publisher: Frontiers. 855
24. JS Higgins, OR Vaughan, dEF Liger, AL Fowden, AN Sterrucci-Perri, Placental phenotype and resource allocation to fetal growth are modified by the timing and degree of hypoxia during mouse pregnancy. *The J. Physiol.* **594**, 1341–1356 (2018) number: 5. 856
25. H Matheson, JHW Veerbeek, DS Charnock-Jones, GJ Burton, HW Yung, Morphological and molecular changes in the murine placenta exposed to normobaric hypoxia throughout pregnancy. *The J. Physiol.* **594**, 1371–1388 (2015) number: 5. 857
26. I Broens, et al., The enigmatic uterine junctional zone: the missing link between reproductive disorders and major obstetrical disorders? *Hum. Reproduction (Oxford, England)* **25**, 569–574 (2010) number: 3 PMID: 20085913. 858
27. P Bu, SMK Alam, P Dhakal, JL Vivian, MJ Soares, A prolactin family paralog regulates placental adaptations to a physiological stressor. *Biol. Reproduction* **94** (2016) number: 5 PMID: 26985002 PMCID: PMC4939737. 859
28. GJ Burton, T Cindrova-Davies, HW Yung, E Jauniaux, Hypoxia and reproductive health: Oxygen and development of the human placenta. *Reproduction (Cambridge, England)* **161**, F53–F65 (2021) PMID: 32438347. 860
29. D Chakraborty, MAK Rumi, T Konno, MJ Soares, Natural killer cells direct hemochorial placentation by regulating hypoxia-inducible factor dependent trophoblast lineage decisions. *Proc. Natl. Acad. Sci.* **108**, 16295–16300 (2011) number: 39 publisher: National Academy of Sciences section: Biological Sciences PMID: 21900602. 861
30. CA Ducas, et al., Gestational hypoxia and developmental plasticity. *Physiol. Rev.* **98**, 1241–1334 (2018). 862
31. D Qu, A McDonald, KJ Whiteley, SA Bainbridge, SL Adamson, Layer-enriched tissue dissection of the mouse placenta in late gestation in *The Guide to Investigation of Mouse Pregnancy*, eds. BA Croy, AT Yamada, FJ DeMayo, SL Adamson. (Academic Press, Boston), pp. 529–535 (2014) DOI: 10.1016/B978-0-12-394445-0.00044-8. 863
32. GE Hoffman, P Roussos, Dream: powerful differential expression analysis for repeated measures designs. *Bioinformatics* **37**, 192–201 (2021). 864
33. AW Bigham, et al., Maternal *prkaa1* and *ednra* genotypes are associated with birth weight, and *prkaa1* with uterine artery diameter and metabolic homeostasis at high altitude. *Physiol. Genomics* **46**, 687–697 (2014) number: 18 PMID: 25225183 PMCID: PMC4166715. 865
34. WE Gundling, et al., Dna methylation explains a subset of placental gene expression differences based on ancestry and altitude. *bioRxiv* p. 261974 (2018). 866
35. LG Moore, Human genetic adaptation to high altitudes: Current status and future prospects. *Quat. Int.* **461**, 4–13 (2017) PMID: 29375239 PMCID: PMC5784843. 867

- 920 36. LG Moore, SM Charles, CG Julian, Humans at high altitude: hypoxia and fetal growth. *Respir. physiology & neurobiology* **178**, 181–190 (2011) number: 1 PMID: 21536153 PMCID: 921 PMC3146554.
- 922 37. LG Moore, et al., Maternal adaptation to high-altitude pregnancy: an experiment of nature—a 923 review. *Placenta* **25A**, S60–71 (2004) PMID: 15033310.
- 924 38. MCT van Patot, G Ebensperger, M Gassmann, AJ Llanos, The hypoxic placenta. *High Alt. 925 Medicine & Biol.* **13**, 176–184 (2012) PMID: 22994517.
- 926 39. OR Vaughan, et al., Effect of high altitude on human placental amino acid transport. *J. Appl. 927 Physiol.* **128**, 127–133 (2019) number: 1 publisher: American Physiological Society.
- 928 40. D Wu, et al., How placenta promotes the successful reproduction in high-altitude populations: 929 A transcriptome comparison between adaptation and acclimatization. *Mol. Biol. Evol.* **39**, 930 msac120 (2022).
- 931 41. S Zamudio, The placenta at high altitude. *High Alt. Medicine & Biol.* **4**, 171–191 (2003) PMID: 932 12855050.
- 933 42. A Dupressoir, et al., A pair of co-opted retroviral envelope syncytin genes is required for 934 formation of the two-layered murine placental syncytiotrophoblast. *Proc. Natl. Acad. Sci.* **108**, 935 E1164–E1173 (2011) publisher: Proceedings of the National Academy of Sciences.
- 936 43. CS Foster, et al., Different genes are recruited during convergent evolution of pregnancy and 937 the placenta. *Mol. Biol. Evol.* **39**, msac077 (2022).
- 938 44. K Knox, JC Baker, Genomic evolution of the placenta using co-option and duplication and 939 divergence. *Genome Res.* **18**, 695–705 (2008) PMID: 18340042 PMCID: PMC2336813.
- 940 45. I Bidirici, et al., Plin2 is essential for trophoblastic lipid droplet accumulation and cell sur- 941 vival during hypoxia. *Endocrinology* **159**, 3937–3949 (2018) PMID: 30351430 PMCID: 942 PMC6240902.
- 943 46. P Ayala-Ramírez, et al., Expression of tissue factor and thrombomodulin in the placentas of 944 pregnancies affected by early-onset and late-onset preeclampsia. *J. Obstet. Gynaecol. Res.* 945 **47**, 2307–2317 (2021) <https://onlinelibrary.wiley.com/doi/pdf/10.1111/jog.14793>.
- 946 47. S Lager, TL Powell, Regulation of nutrient transport across the placenta. *J. Pregnancy* **2012**, 947 e179827 (2012) publisher: Hindawi.
- 948 48. RR Starks, et al., Transcription factor *plagl1* is associated with angiogenic gene expression in 949 the placenta. *Int. J. Mol. Sci.* **21**, 8317 (2020) PMID: 33171905 PMCID: PMC7664191.
- 950 49. LR Stow, ME Jacobs, CS Wingo, BD Cain, Endothelin-1 gene regulation. *The FASEB J.* **25**, 951 16–28 (2011) <https://onlinelibrary.wiley.com/doi/pdf/10.1096/fj.10-161612>.
- 952 50. LG Thaete, T Jilling, S Synowiec, S Khan, MG Neerhof, Expression of endothelin 1 and its 953 receptors in the hypoxic pregnant rat. *Biol. reproduction* **77**, 526–532 (2007) PMID: 17554077 954 PMCID: PMC1989130.
- 955 51. M Rasmussen, et al., Rna profiles reveal signatures of future health and disease in pregnancy. 956 *Nature* **601**, 422–427 (2022) number: 7893 publisher: Nature Publishing Group.
- 957 52. S Shaha, et al., Human placenta and trophoblasts simultaneously express three isoforms of 958 atypical protein kinase-c. *Placenta* **119**, 39–43 (2022).
- 959 53. S Sifakis, et al., Placental expression of *pappa*, *pappa2* and *plac-1* in pregnancies is associated 960 with *figr*. *Mol. Medicine Reports* **17**, 6435–6440 (2018) publisher: Spandidos Publications.
- 961 54. JY Zhu, ZJ Pang, Yh Yu, Regulation of trophoblast invasion: The role of matrix metallopro- 962 teinases. *Rev. Obstet. Gynecol.* **5**, e137–e143 (2012) PMID: 23483768 PMCID: PMC3594863.
- 963 55. AN Chesnutt, Physiology of normal pregnancy. *Critical Care Clin.* **20**, 609–615 (2004) publisher: 964 Elsevier PMID: 15388191.
- 965 56. M Centlow, et al., Placental expression profiling in preeclampsia: local overproduction of 966 hemoglobin may drive pathological changes. *Fertility sterility* **90**, 1834–1843 (2008) PMID: 967 18166190 PMCID: PMC2628488.
- 968 57. K May, et al., Perfusion of human placenta with hemoglobin introduces preeclampsia-like 969 injuries that are prevented by alpha1-microglobulin. *Placenta* **32**, 323–332 (2011).
- 970 58. P Langfelder, S Horvath, Wgcn: an r package for weighted correlation network analysis. *BMC 971 bioinformatics* **9**, 559 (2008) PMID: 19114408 PMCID: PMC2631488.
- 972 59. JP Velotta, ZA Cheviron, Remodeling ancestral phenotypic plasticity in local adaptation: A 973 new framework to explore the role of genetic compensation in the evolution of homeostasis. 974 *Integr. Comp. Biol.* **58**, 1098–1110 (2018) number: 6.
- 975 60. DIR Holmes, I Zachary, Placental growth factor induces *fosb* and *c-fos* gene expression via 976 *flt-1* receptors. *FEBS Lett.* **557**, 93–98 (2004).
- 977 61. V Sitrans, R Paulussen, J Leirvik, A Vartun, G Acharya, Placental gene expression profile in 978 intrauterine growth restriction due to placental insufficiency. *Reproductive Sci.* **16**, 701–711 979 (2009).
- 980 62. I Sandovici, et al., The imprinted *igf2*/*igf2r* axis is critical for matching placental microvascu- 981 lature expansion to fetal growth. *Dev. Cell* **57**, 63–79.e8 (2022) PMID: 34963058 PMCID: 982 PMC8751640.
- 983 63. HW Yung, M Cox, M Tissot van Patot, GJ Burton, Evidence of endoplasmic reticulum stress 984 and protein synthesis inhibition in the placenta of non-native women at high altitude. *The 985 FASEB J.* **26**, 1970–1981 (2012) publisher: Federation of American Societies for Experimental 986 Biology.
- 987 64. J Friedrich, P Wiener, Selection signatures for high-altitude adaptation in ruminants. *Animal 988 Genet.* **51**, 157–165 (2020) <https://onlinelibrary.wiley.com/doi/pdf/10.1111/age.12900>.
- 989 65. ME Pamenter, JE Hall, Y Tanabe, TS Simonson, Cross-species insights into genomic adapta- 990 tions to hypoxia. *Front. Genet.* **11** (2020) [Online; accessed 2022-09-26].
- 991 66. JF Storz, Hemoglobin function and physiological adaptation to hypoxia in high-altitude mam- 992 mals. *J. Mammal.* **88**, 24–31 (2007).
- 993 67. DD Wu, et al., Convergent genomic signatures of high-altitude adaptation among domestic 994 mammals. *Natl. Sci. Rev.* **7**, 952–963 (2020).
- 995 68. JF Storz, High-altitude adaptation: Mechanistic insights from integrated genomics and physiol- 996 ogy. *Mol. Biol. Evol.* **38**, 2677–2691 (2021).
- 997 69. X Yi, et al., Sequencing of 50 human exomes reveals adaptation to high altitude. *Science* **329**, 998 75–78 (2010) number: 5987 PMID: 20595611.
- 999 70. J Jebbink, et al., Expression of placental *flt1* transcript variants relates to both gestational 1000 hypertensive disease and fetal growth. *Hypertension* **58**, 70–76 (2011) publisher: American 1001 Heart Association.
- 1002 71. D Bryant, et al., Diverse species-specific phenotypic consequences of loss of function sorting 1003 nexin 14 mutations. *Sci. Reports* **10**, 13763 (2020) number: 1 publisher: Nature Publishing 1004 Group.
- 1005 72. MN Moufarrej, et al., Early prediction of preeclampsia in pregnancy with cell-free rna. *Nature 1006* **602**, 689–694 (2022).
- 1007 73. M Karlsson, et al., A single-cell type transcriptomics map of human tissues. *Sci. Adv.* **7**, 1008 eabh2169 (2021) publisher: American Association for the Advancement of Science.
- 1009 74. I Papatheodorou, et al., Expression atlas update: from tissues to single cells. *Nucleic Acids 1010 Res.* **48**, D77–D83 (2020).
- 1011 75. R Vento-Tormo, et al., Single-cell reconstruction of the early maternal–fetal interface in humans. 1012 *Nature* **563**, 347–353 (2018) number: 7731 publisher: Nature Publishing Group.
- 1013 76. A Corfield, Eukaryotic protein glycosylation: a primer for histochemists and cell biologists. 1014 *Histochem. Cell Biol.* **147**, 119–147 (2017) PMID: 28012131 PMCID: PMC5306191.
- 1015 77. AP Corfield, Mucins: a biologically relevant glycan barrier in mucosal protection. *Biochimica 1016 Et Biophys. Acta* **1850**, 236–252 (2015) PMID: 24821013.
- 1017 78. MK Shyu, et al., Muc1 expression is increased during human placental development and 1018 suppresses trophoblast-like cell invasion in vitro. *Biol. Reproduction* **79**, 233–239 (2008).
- 1019 79. MK Shyu, et al., Mucin 15 is expressed in human placenta and suppresses invasion of 1020 trophoblast-like cells in vitro. *Hum. Reproduction* **22**, 2723–2732 (2007).
- 1021 80. G Laskarin, SS Medanic, A Redzovic, D Duric, D Rukavina, Specific decidual cd14+ cells 1022 hamper cognate nk cell proliferation and cytolytic mediator expression after mucin 1 treatment 1023 in vitro. *J. Reproductive Immunol.* **95**, 36–45 (2012).
- 1024 81. C Scholz, et al., Association of placental inflammation with fetomaternal hemorrhage and loss 1025 of placental mucin-1. *Arch. Gynecol. Obstet.* **285**, 605–612 (2012).
- 1026 82. BV Natale, et al., Reduced uteroplacental perfusion pressure (rupp) causes altered trophoblast 1027 differentiation and pericyte reduction in the mouse placenta labyrinth. *Sci. Reports* **8**, 17162 1028 (2018) number: 1 publisher: Nature Publishing Group.
- 1029 83. CA Dias-Junior, et al., Angiogenic imbalance and diminished matrix metalloproteinase-2 and 1030 -9 underlie regional decreases in uteroplacental vascularization and fetoplacental growth in 1031 hypertensive pregnancy. *Biochem. pharmacology* **146**, 101–116 (2017) PMID: 28912068 1032 PMCID: PMC5705464.
- 1033 84. A Chu, et al., The placental transcriptome in late gestational hypoxia resulting in murine 1034 intrauterine growth restriction parallels increased risk of adult cardiometabolic disease. *Sci. 1035 Reports* **9**, 1243 (2019) number: 1 publisher: Nature Publishing Group.
- 1036 85. J Nevalainen, S Skarp, ER Savolainen, M Rynänen, J Järvenpää, Intrauterine growth 1037 restriction and placental gene expression in severe preeclampsia, comparing early-onset and 1038 late-onset forms. *J. Perinat. Medicine* **45**, 869–877 (2017) publisher: De Gruyter.
- 1039 86. N de Alwis, et al., *Daam2* is elevated in the circulation and placenta in pregnancies complicated 1040 by fetal growth restriction and is regulated by hypoxia. *Sci. Reports* **11**, 5540 (2021) number: 1041 1 publisher: Nature Publishing Group.
- 1042 87. AW Kramer, LM Lamale-Smith, VD Winn, Differential expression of human placental *papp-a2* 1043 over gestation and in preeclampsia. *Placenta* **37**, 19–25 (2016).
- 1044 88. LM Lamale-Smith, et al., Uteroplacental ischemia is associated with increased *papp-a2*. 1045 *Reproductive Sci.* **27**, 529–536 (2020).
- 1046 89. K Macintire, et al., *Pappa2* is increased in severe early onset pre-eclampsia and upregulated 1047 with hypoxia. *Reproduction, Fertility Dev.* **26**, 351 (2014).
- 1048 90. D Chakraborty, et al., *Hif-kdm3a-mmp12* regulatory circuit ensures trophoblast plasticity and 1049 placental adaptations to hypoxia. *Proc. Natl. Acad. Sci.* **113**, E7212–E7221 (2016) number: 1050 46 PMID: 27807143.
- 1051 91. D Bates, M Mächler, B Bolker, S Walker, Fitting linear mixed-effects models using lme4. *J. 1052 Stat. Softw.* **67** (2015) number: 1.
- 1053 92. J Fox, S Weisberg, *An R companion to applied regression*. (Sage publications), (2018).
- 1054 93. RV Lenth, emmeans: Estimated marginal means, aka least-squares means (2021) Program- 1055 mers.n25039.
- 1056 94. A Kuznetsova, PB Brockhoff, RHB Christensen, lmerTest package: Tests in linear mixed effects 1057 models. *J. Stat. Softw.* **82** (2017) number: 13.
- 1058 95. AM Bolger, M Lohse, B Usadel, Trimmomatic: a flexible trimmer for illumina sequence data. 1059 *Bioinformatics* **30**, 2114–2120 (2014).
- 1060 96. D Kim, JM Paggi, C Park, C Bennett, SL Salzberg, Graph-based genome alignment and 1061 genotyping with hisat2 and hisat-genotype. *Nat. biotechnology* **37**, 907–915 (2019) PMID: 1062 31375807 PMCID: PMC7605509.
- 1063 97. Y Liao, GK Smyth, W Shi, featureCounts: an efficient general purpose program for assigning 1064 sequence reads to genomic features. *Bioinformatics* **30**, 923–930 (2014).
- 1065
